# Supplementary material
Source: PubMed Central journal article supplement (PMC6128770)
Supplement: NIHMS983859-supplement-Supplemental_Figure_1.pdf [file NIHMS983859-supplement-Supplemental_Figure_1.pdf]

## **Upregulation of suppressor of cytokine signaling 3 in microglia by cinnamic acid**

**Sudipta Chakrabarti, Malabendu Jana, Avik Roy, and Kalipada Pahan**

Division of Research and Development, Jesse Brown Veterans Affairs Medical Center, Chicago, USA; Department of Neurological Sciences, Rush University Medical Center, Chicago, USA

### **Legend to supplementary figure**

**Figure 1. Mass spectrometric analysis of cinnamic acid.** One mg trans cinnamic acid powder was solubilized in 1 ml methanol. After centrifugation, the extract (1  $\mu$ l) was loaded onto a GC mass spectrometer (JEOL GCmate).

NIST MS 1 of 40 (102-94-3)  
Base: m/z 147 #Ions: 75  
(Z)-3-Phenyl-2-propenoic acid

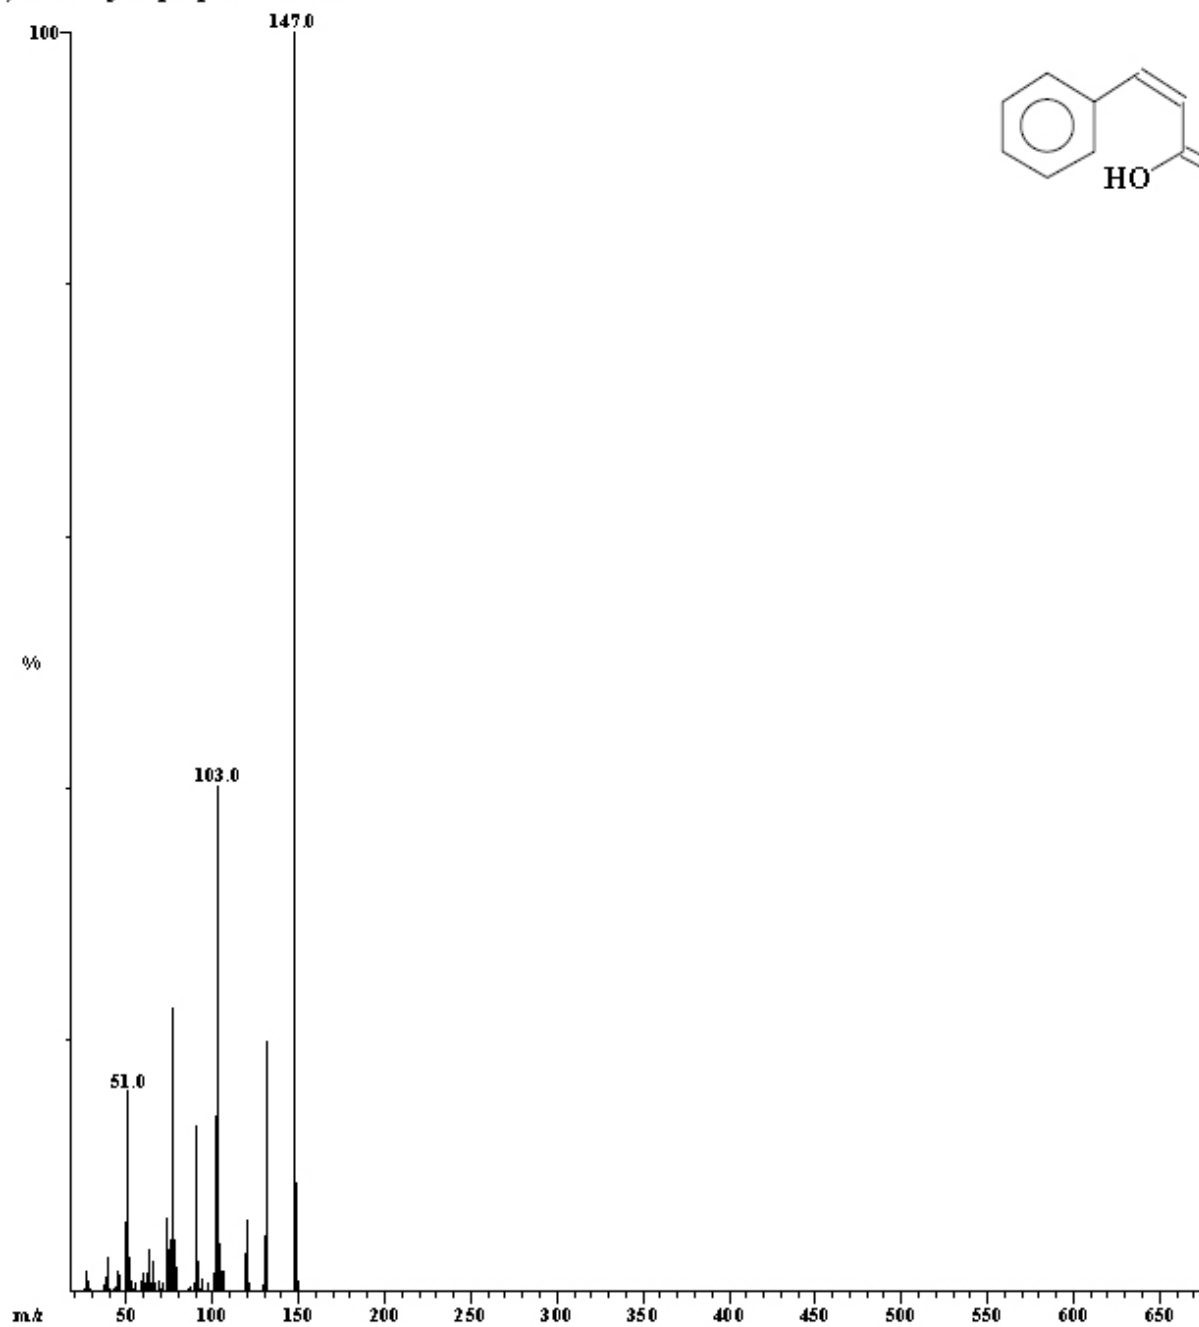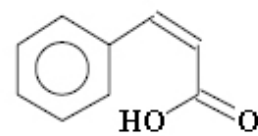

Supplementary Figure 1
